# Supplementary material for: An Ensemble-Base Machine Learning Approach to Predict 2- and 10-Year Breast Cancer
Source: Research Square preprint supplement (doi:10.21203/rs.3.rs-8374118/v1), 2026-02-22
Supplement: Supplementary file 1 [file 302648098c48006202e6d4cc.docx]

**Supplementary Figures**


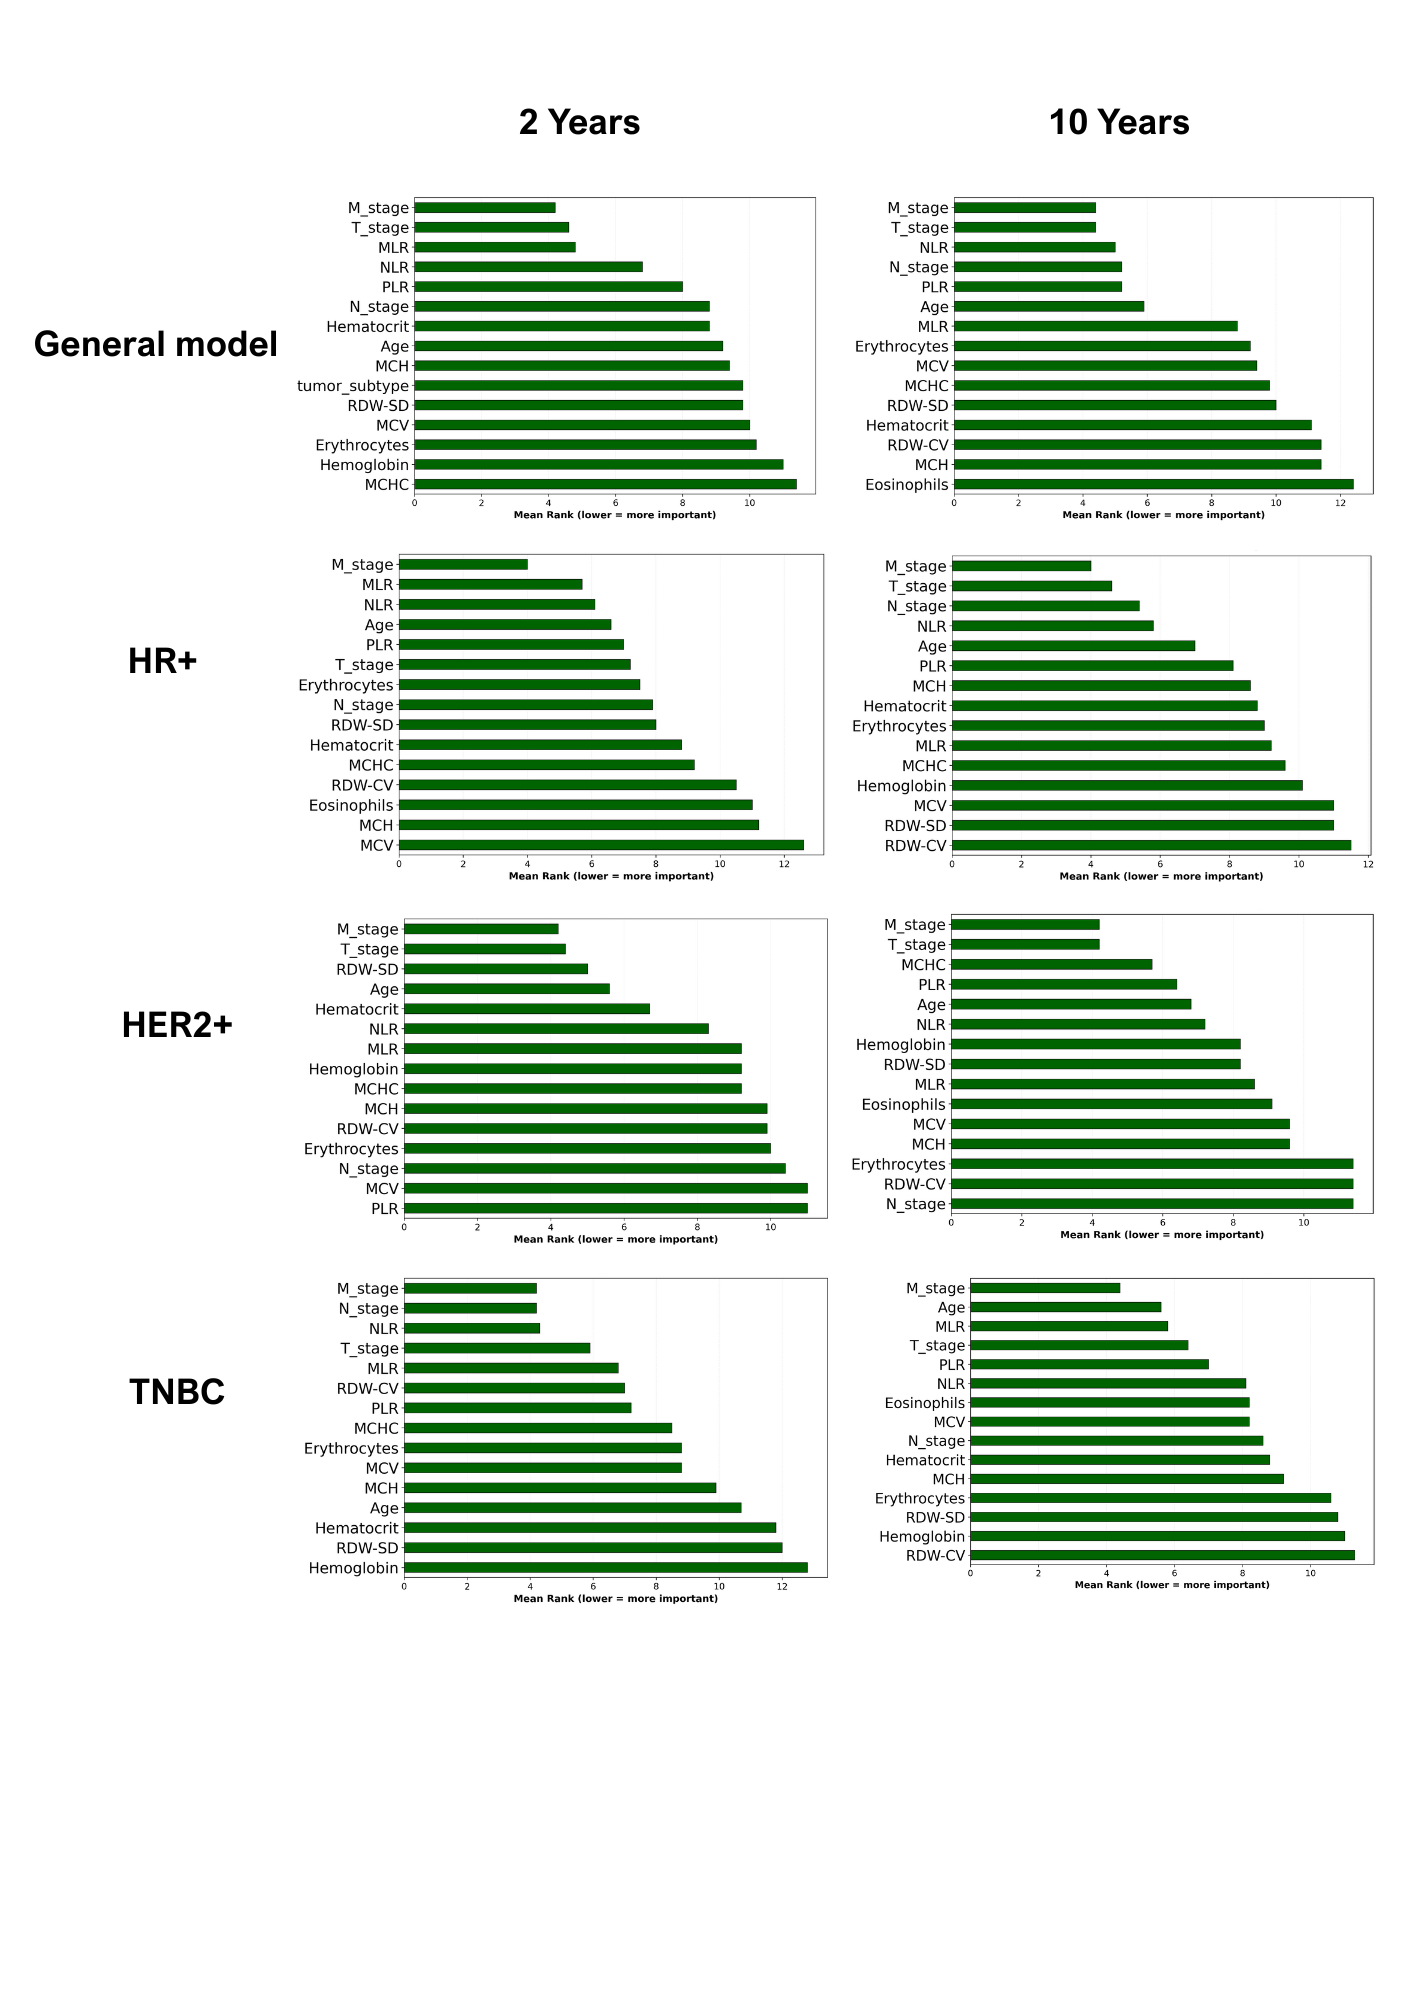


**Supplementary Figure S1: Blood-based markers are as important as TNM in Prediction Models Across Molecular Subtypes.** Mean feature importance rankings aggregated across five machine learning algorithms for both 2-year and 10-year recurrence or mortality predictions (lower rank = higher importance). Hematologic indices, particularly red cell parameters (MCHC, MCV, RDW-CV, RDW-SD) and complete blood count measures (hemoglobin, erythrocytes, eosinophils), consistently rank among the top predictors alongside clinical staging (M stage, T stage, N stage) across all molecular subtypes in both prediction timeframes. Feature importance patterns differ between 2-year and 10-year models: inflammatory ratios (PLR, NLR, MLR) show higher importance in short-term predictions, while red cell distribution indices (RDW-CV, RDW-SD) and hemoglobin concentration (MCHC) dominate long-term predictions.

| **Characteristic** | **N** | **HR** **(95% CI)**1 | **p-value** |
| --- | --- | --- | --- |
| **Platelets** | 4,277 | 1.00 (1.00 to 1.00) | **<0.001** |
| **Monocyte** | 4,277 | 2.41 (1.95 to 2.97) | **<0.001** |
| **Lymphocyte** | 4,277 | 0.87 (0.81 to 0.94) | **<0.001** |
| **Neutrophil** | 4,277 | 1.12 (1.10 to 1.15) | **<0.001** |
| **Leucocyte** | 4,277 | 1.08 (1.06 to 1.10) | **<0.001** |
| **Eosinophils** | 4,277 | 1.03 (0.79 to 1.36) | 0.81 |
| **Erythrocyte** | 4,277 | 0.66 (0.58 to 0.74) | **<0.001** |
| **Hematocrit** | 4,277 | 0.94 (0.93 to 0.95) | **<0.001** |
| **Hemoglobin** | 4,277 | 0.84 (0.81 to 0.87) | **<0.001** |
| **RDW.CV** | 4,277 | 1.16 (1.13 to 1.19) | **<0.001** |
| **RDW.SD** | 4,277 | 1.06 (1.05 to 1.07) | **<0.001** |
| **CHCM** | 4,277 | 0.87 (0.83 to 0.91) | **<0.001** |
| **HCM** | 4,277 | 0.95 (0.93 to 0.97) | **<0.001** |
| **VCM** | 4,277 | 0.99 (0.98 to 1.00) | **0.045** |
| **NLR** | 4,277 | 1.16 (1.13 to 1.18) | **<0.001** |
| **PLR** | 4,277 | 1.00 (1.00 to 1.00) | **<0.001** |
| **MLR** | 4,277 | 3.78 (3.15 to 4.55) | **<0.001** |
| **Clinical Stage T** | 4,277 |  |  |
| *0* |  | — |  |
| *1* |  | 11,704 (0.00 to Inf) | 0.98 |
| *2* |  | 21,009 (0.00 to Inf) | 0.98 |
| *3* |  | 42,020 (0.00 to Inf) | 0.98 |
| *4* |  | 90,612 (0.00 to Inf) | 0.98 |
| **Clinical Stage M** | 4,277 |  |  |
| *0* |  | — |  |
| *1* |  | 7.64 (6.80 to 8.58) | **<0.001** |
| **Molecular subtype** | 4,277 |  |  |
| *HR+* |  | — |  |
| *HER2+* |  | 1.04 (0.91 to 1.19) | 0.57 |
| *TNBC* |  | 1.80 (1.59 to 2.05) | **<0.001** |
| 1HR = Hazard Ratio, CI = Confidence Interval | | | |

**Supplementary Figure S2:** Hematologic Parameters Show Strong Univariate Associations with Breast Cancer Overall Survival. Univariate Cox proportional hazards regression analysis of hematologic biomarkers, inflammatory ratios, clinical staging, and molecular subtypes (N=4,277). Hazard ratios (HR) > 1 indicate increased mortality risk, while HR < 1 indicate protective effects. Elevated monocyte counts (HR=2.41), MLR (HR=3.78), and RDW.CV (HR=1.16) show the strongest adverse associations, while higher erythrocyte counts (HR=0.66), hemoglobin (HR=0.84), and hematocrit (HR=0.94) demonstrate protective effects. All hematologic parameters except eosinophils reached statistical significance (p<0.05). The triple-negative subtype (TNBC) shows significantly elevated risk (HR=1.80) compared to other molecular subtypes.


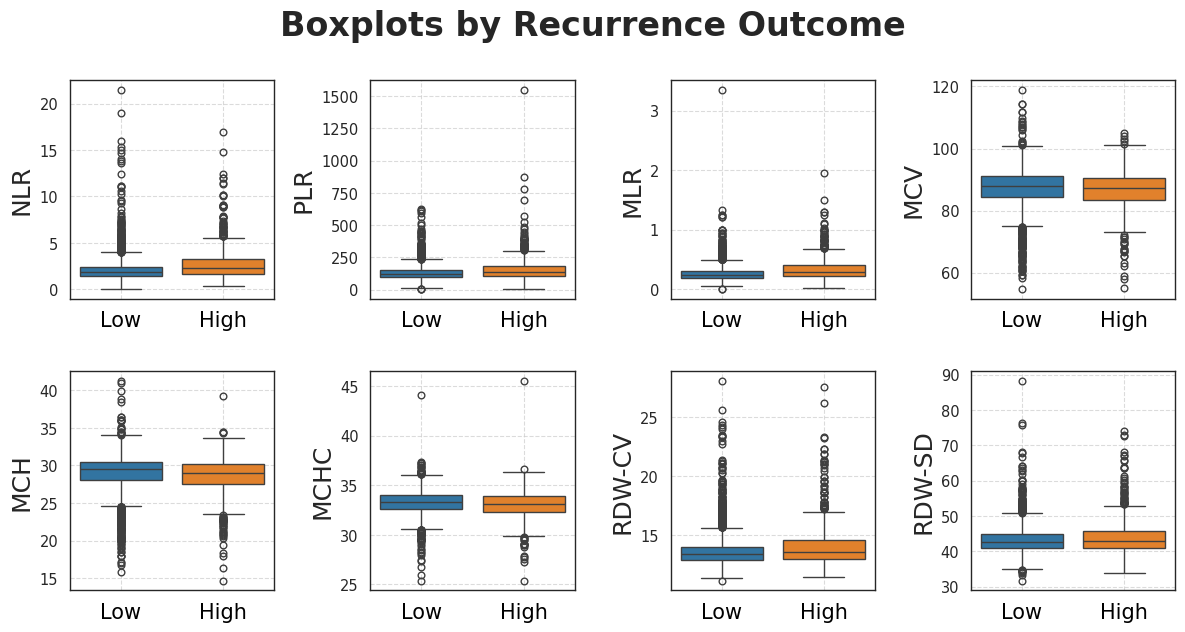


**Supplementary Figure S3: Boxplot of values for breast cancer patients (all subtypes of the general model) by the risk of recurrence or death in 2 years.** “High” risk group (orange bars) presented recurrence or death in less than 2 years, and “Low” risk group (blue bars) did not. NLR: neutrophil to lymphocyte ratio. PLR: platelet to lymphocyte ratio. MLR: monocyte to lymphocyte ratio. MCV: Mean Corpuscular Volume, reference value: 80 - 95 fL. MCH: Mean Corpuscular Hemoglobin, reference value: 27 - 34 pg. MCHC: Mean Corpuscular Hemoglobin Concentration, reference value: 30 - 35 g/dL. RDW-CV: Red Cell Distribution Width-Coefficient of Variation, reference value: 11.6 - 14.4%. RDW-SD: Red Cell Distribution Width-Standard Deviation, reference value: 35.1 - 43.9 fL.


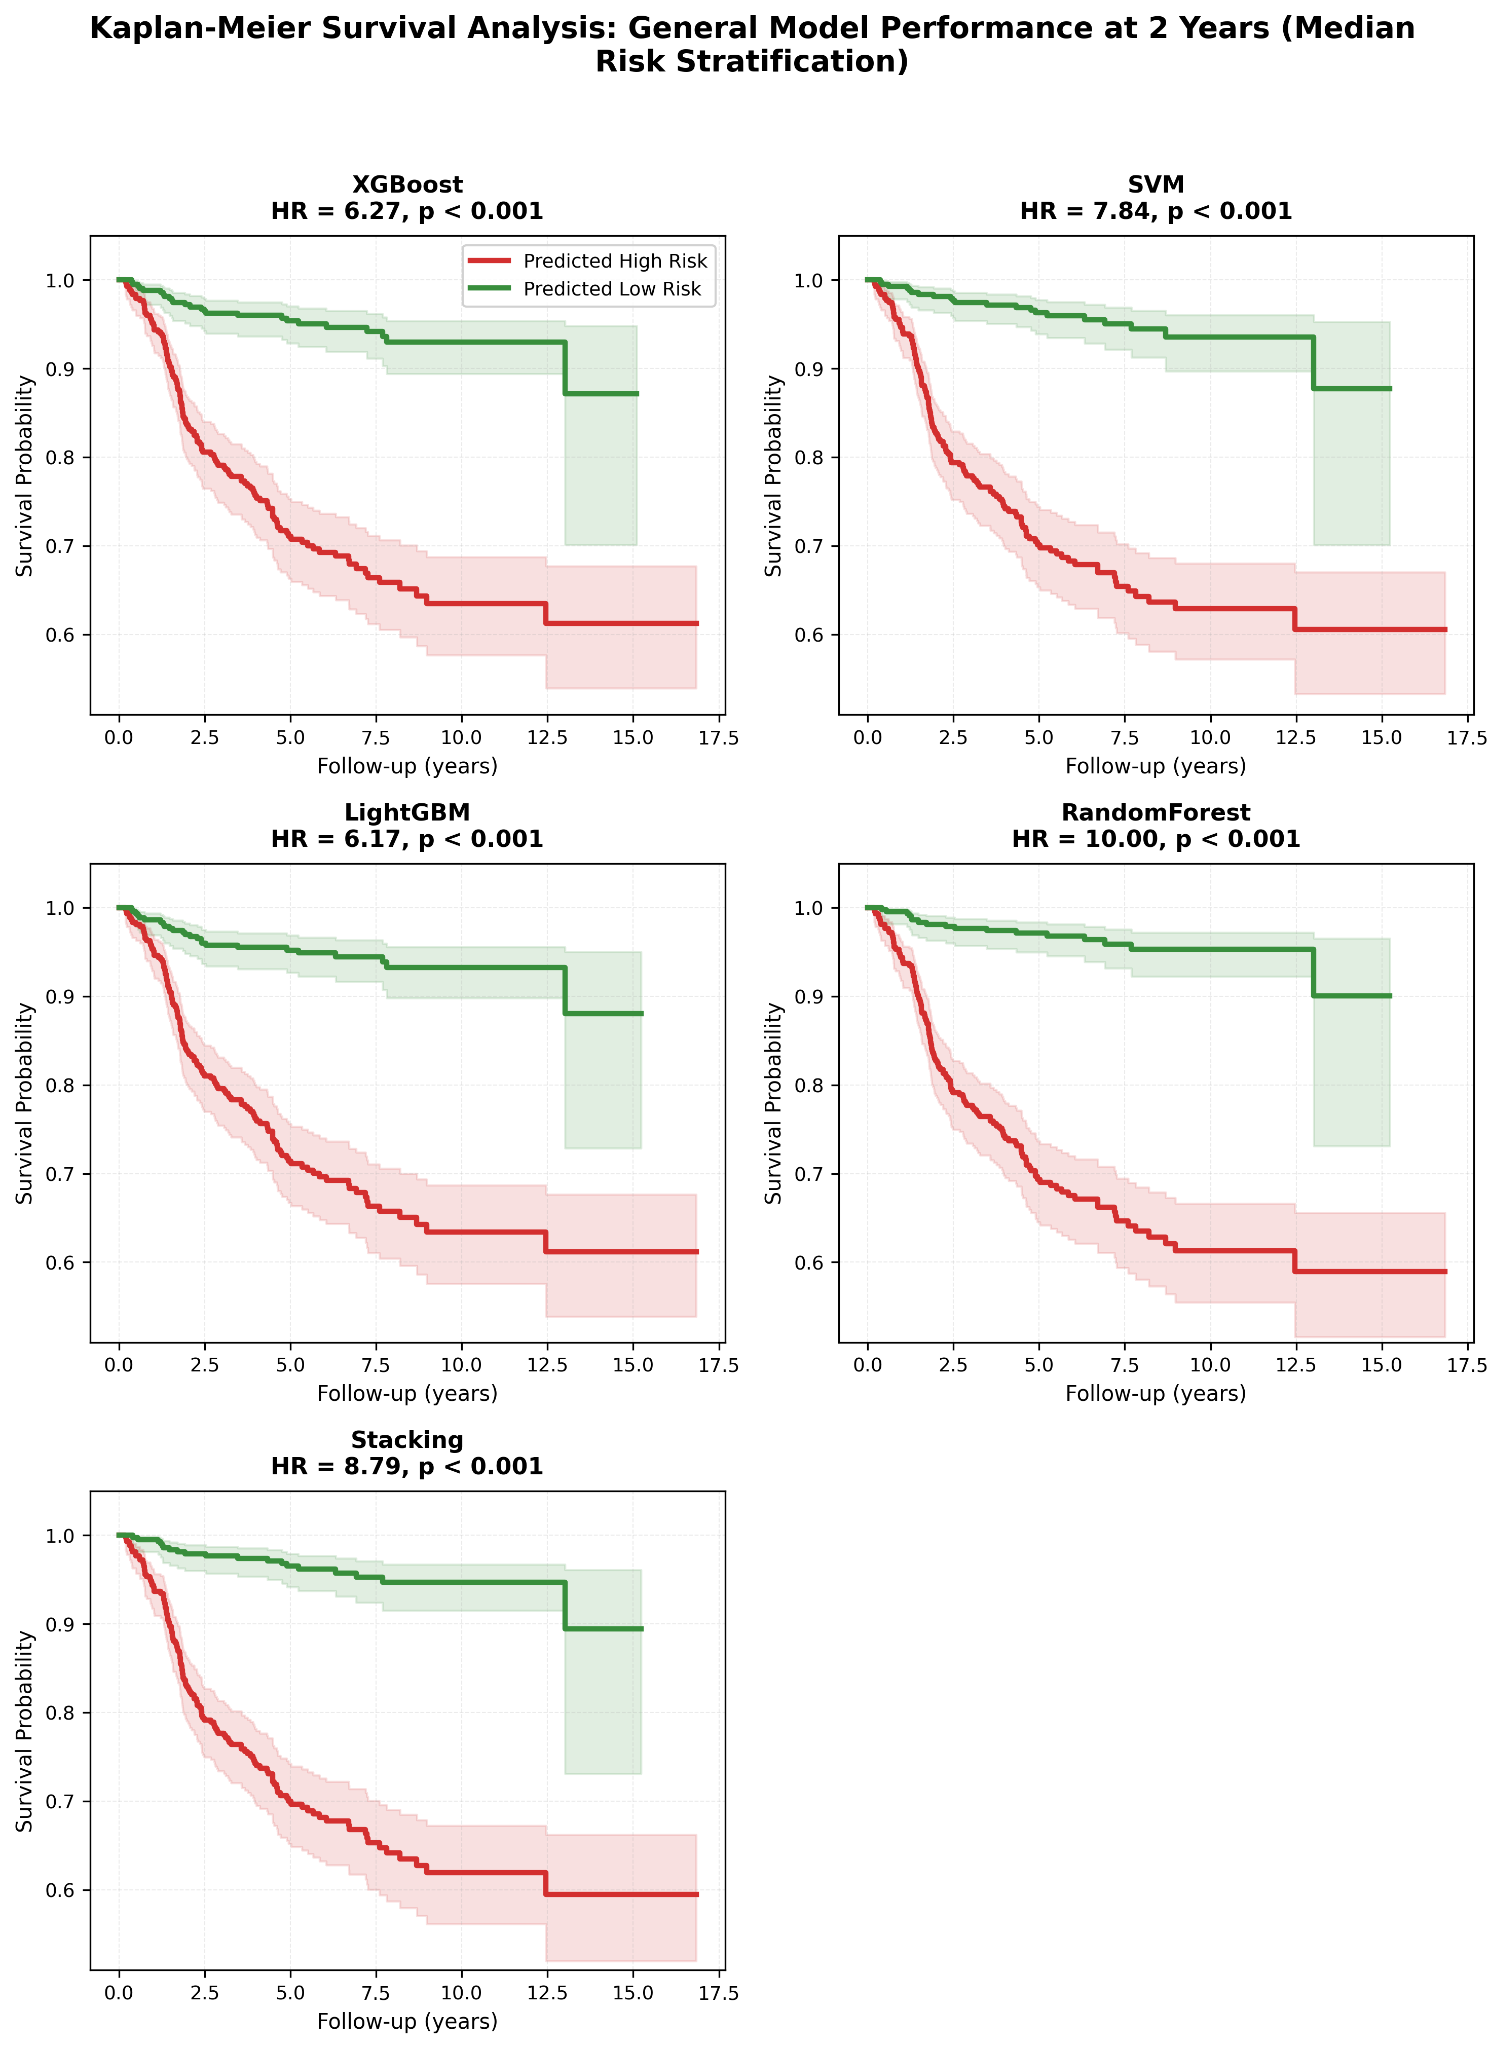


**Supplementary Figure S4: Kaplan-Meier Analysis for 2-Year Risk Discrimination in General Cohort.** Survival curves stratified by median probability threshold comparing high-risk (red) versus low-risk (green) patient groups. All five algorithms demonstrated significant separation with hazard ratios: XGBoost (HR = 6.27), SVM (HR = 7.84), LightGBM (HR = 6.17), RandomForest (HR = 10.00), and Stacking ensemble (HR = 8.79), all p < 0.001. Shaded regions indicate 95% confidence intervals. RandomForest achieved the strongest discrimination.​

**
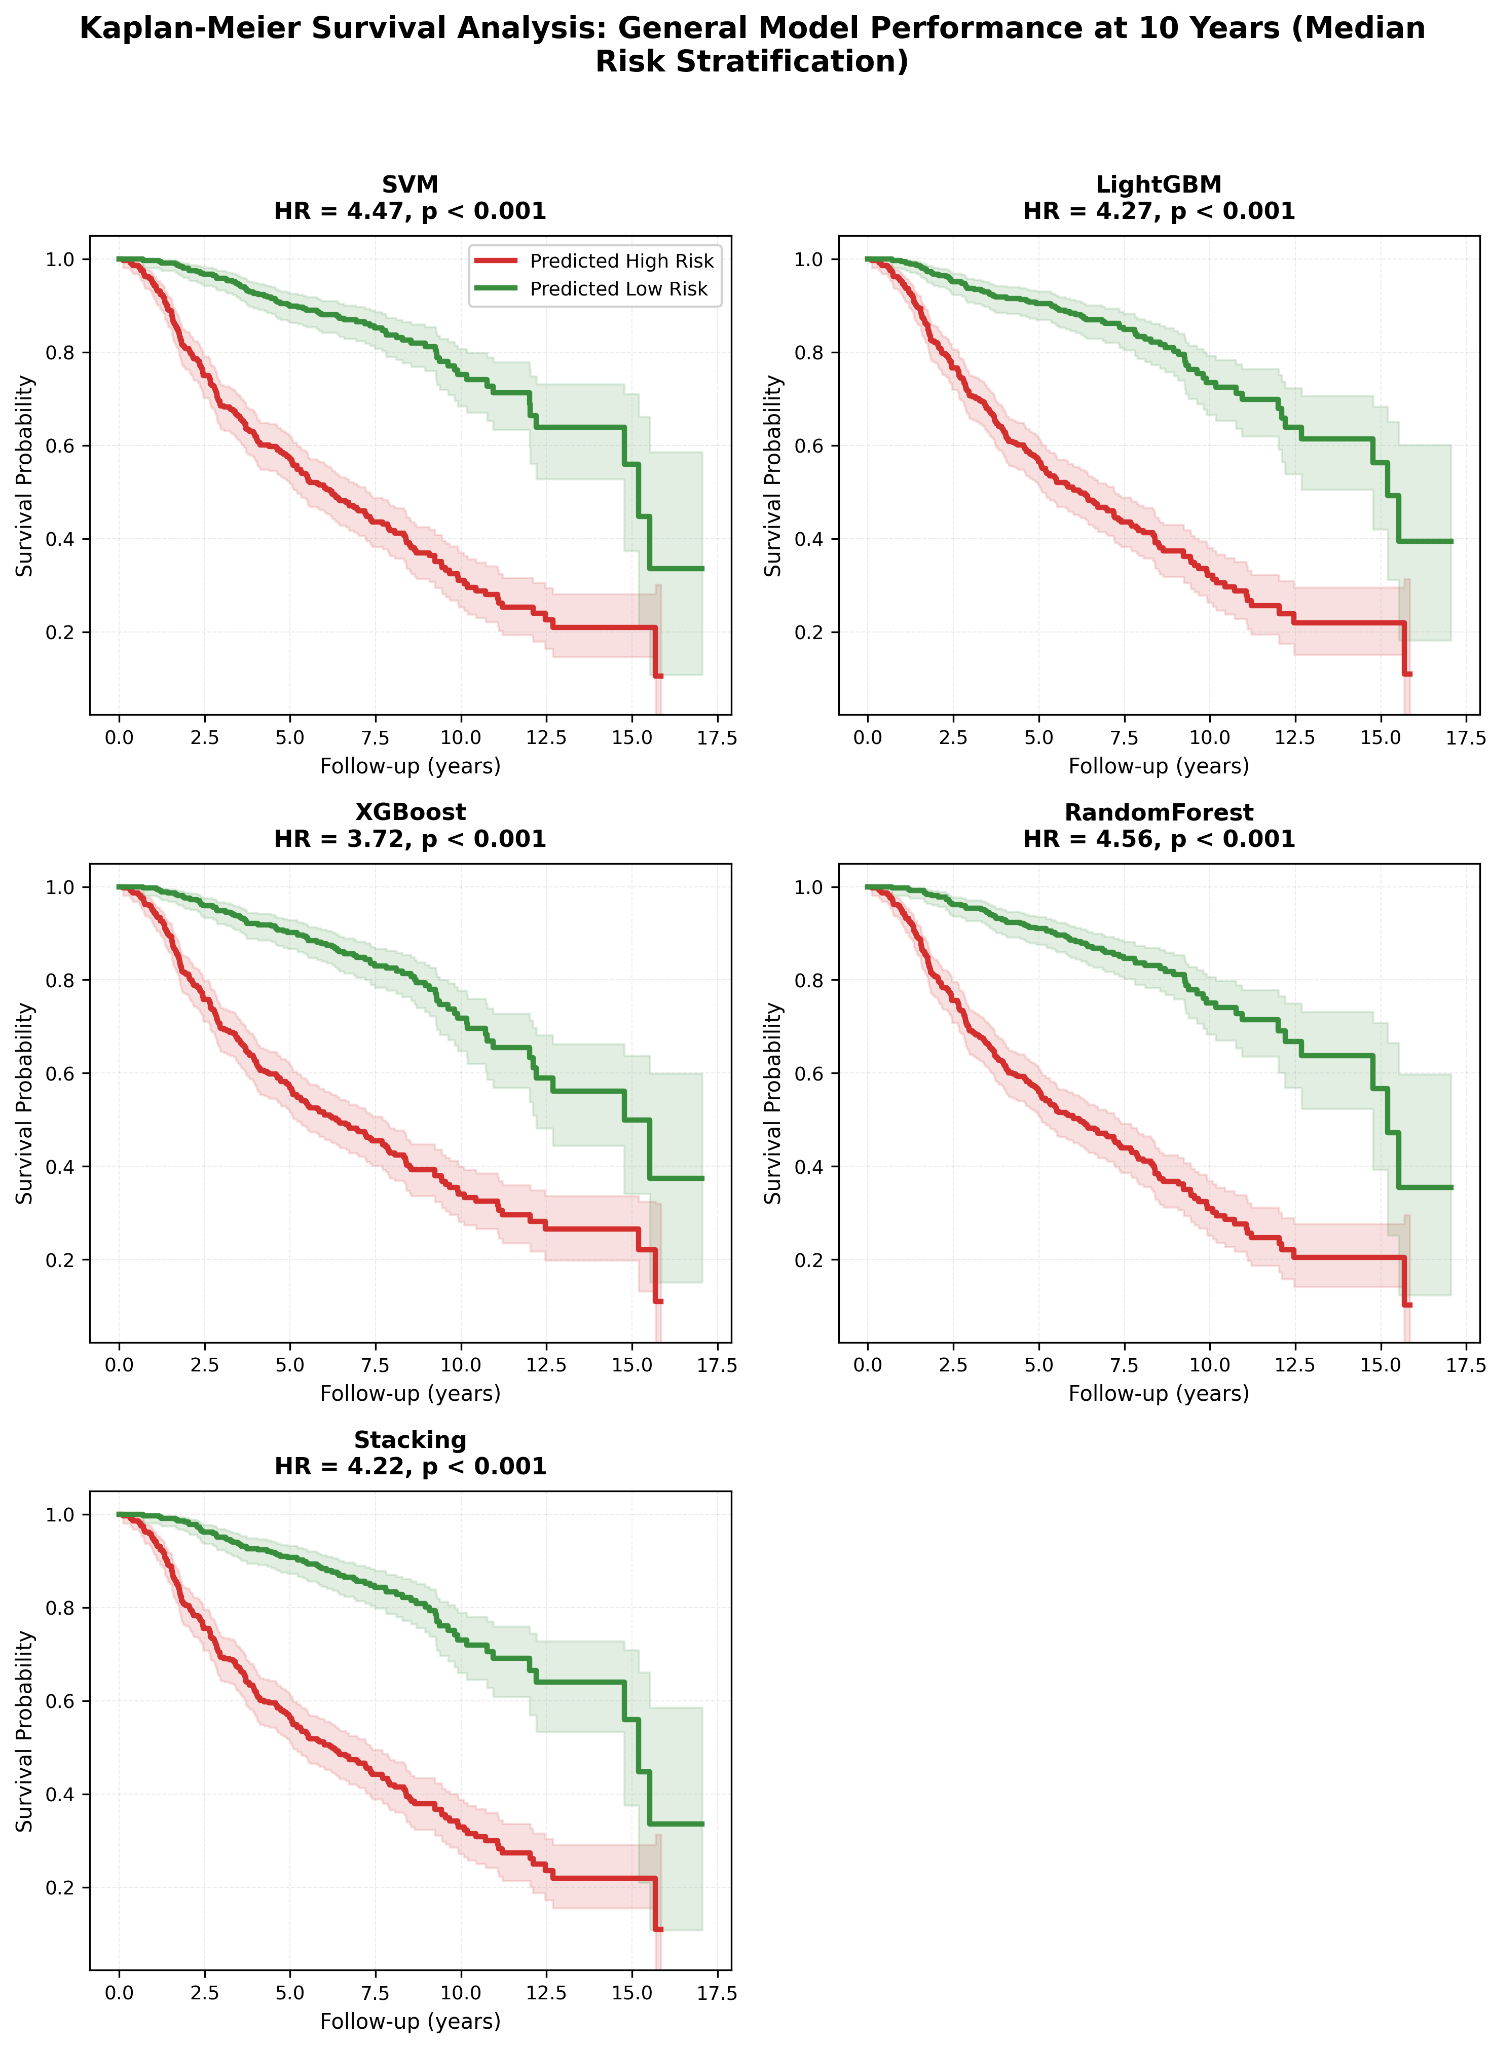
**

**Supplementary Figure S5: Kaplan-Meier Analysis for 10-Year Risk Discrimination in General Cohort.** Survival curves stratified by median probability threshold comparing high-risk (red) versus low-risk (green) patient groups. All five algorithms demonstrated significant separation with hazard ratios: SVM (HR = 4.47), LightGBM (HR = 4.27), XGBoost (HR = 3.72), RandomForest (HR = 4.56), and Stacking ensemble (HR = 4.22), all p < 0.001. Shaded regions indicate 95% confidence intervals. RandomForest achieved the strongest discrimination.

**
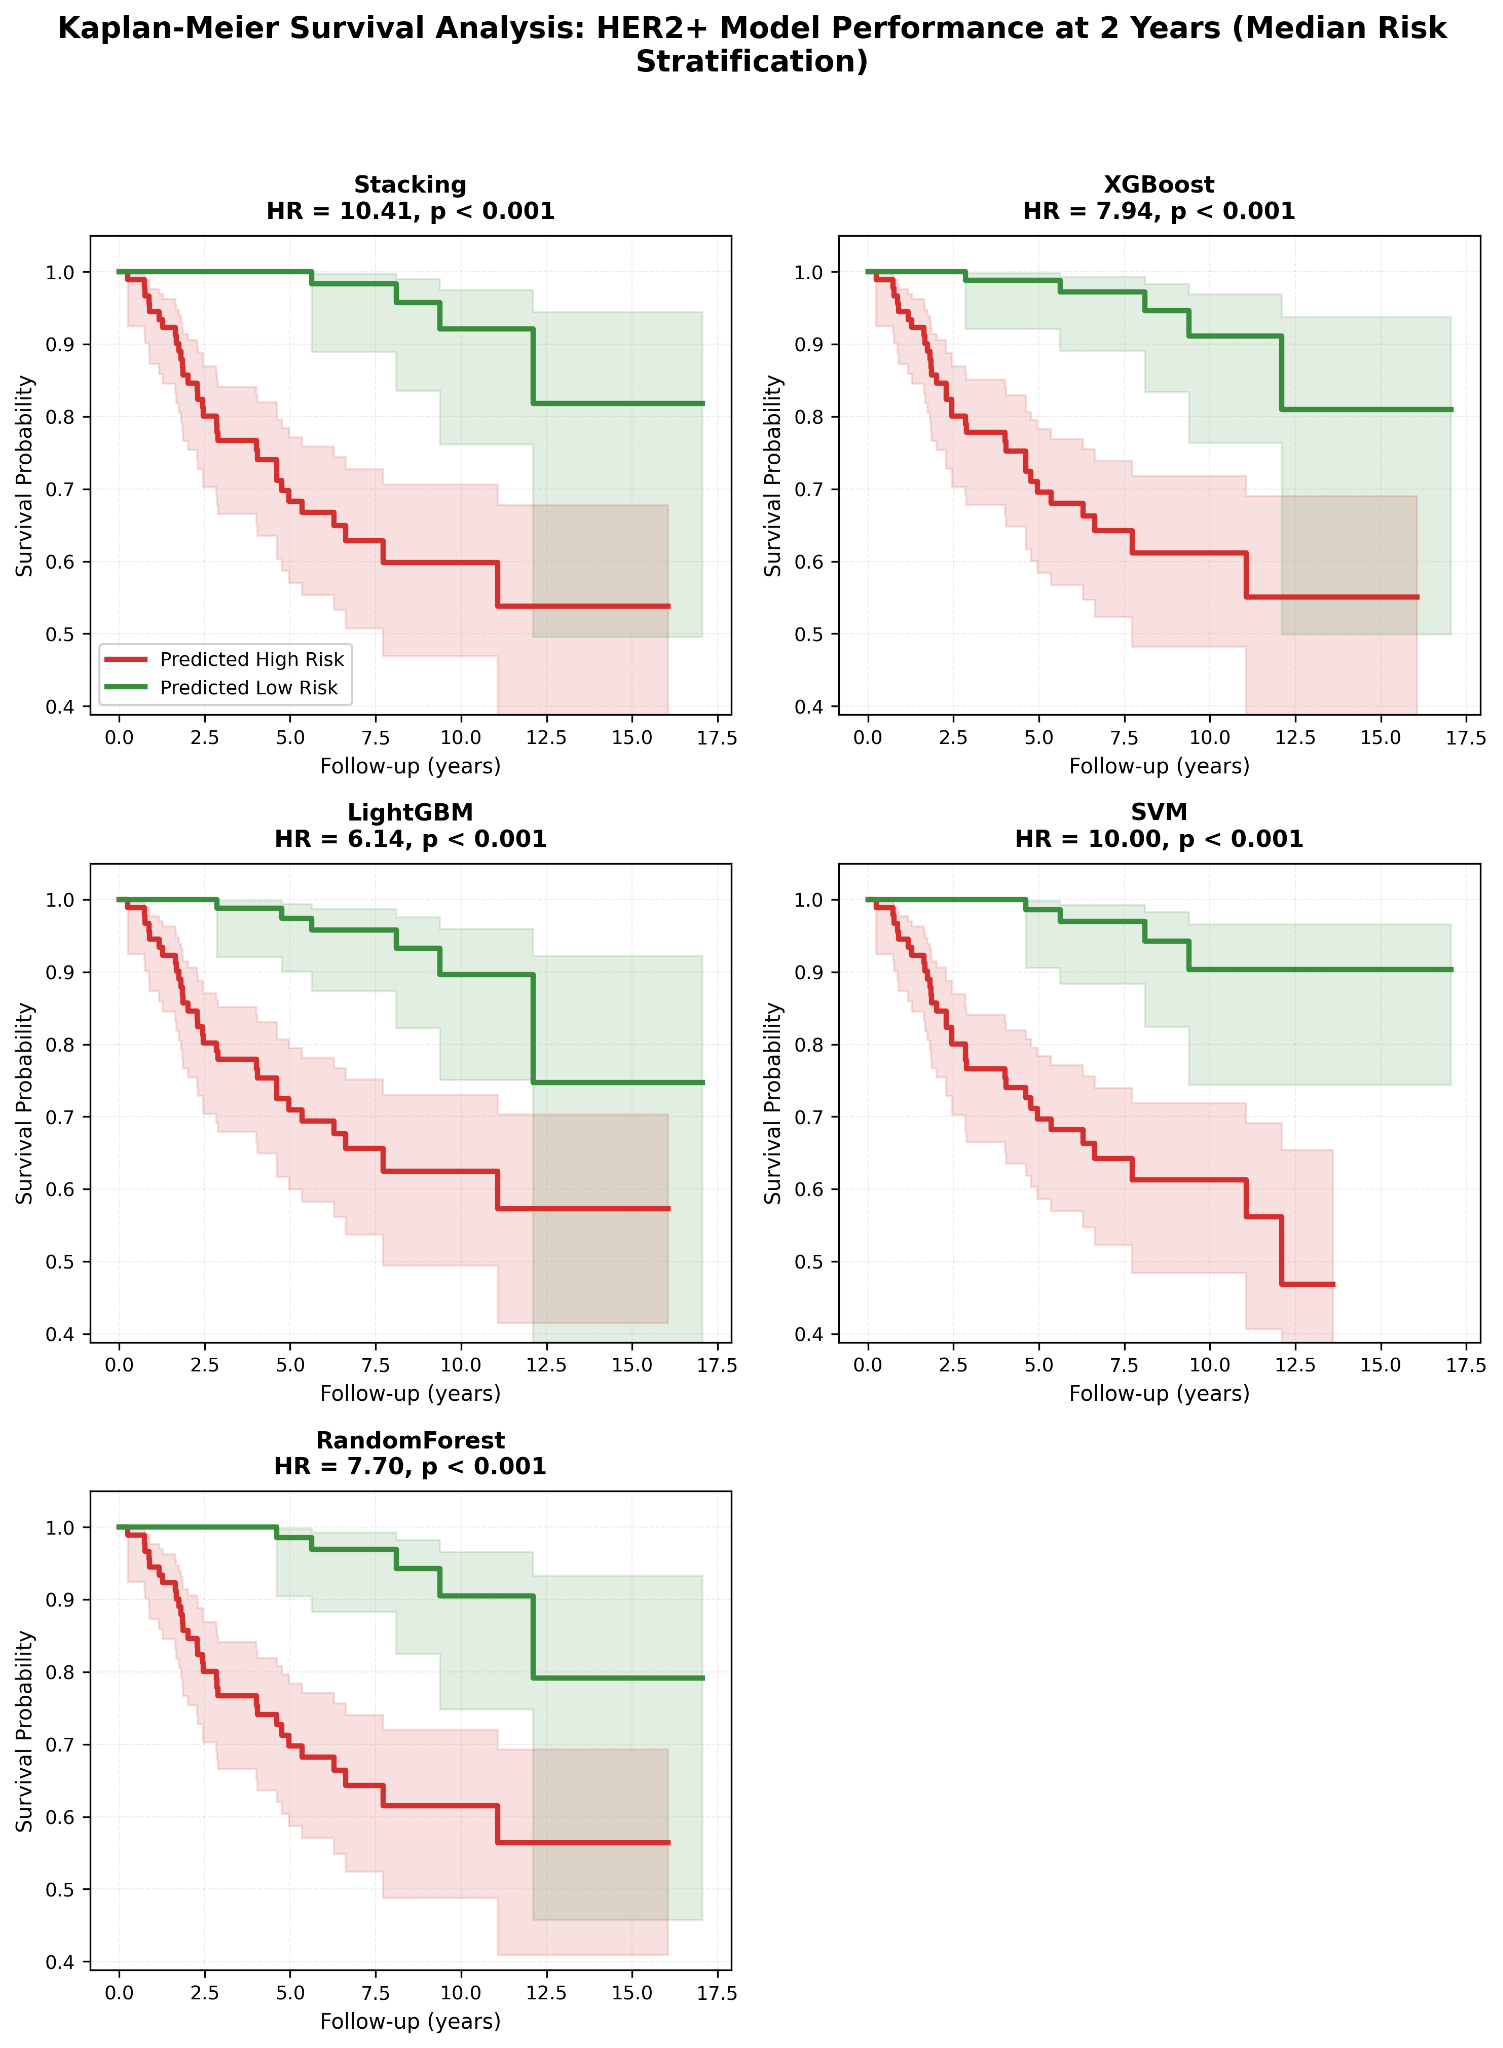
**

**Supplementary Figure S6: Kaplan-Meier Analysis for 2-Year Risk Discrimination in HER2+ Cohort.** Survival curves stratified by median probability threshold comparing high-risk (red) versus low-risk (green) patient groups. All five algorithms demonstrated significant separation with hazard ratios: Stacking (HR = 10.41), SVM (HR = 10.00), XGBoost (HR = 7.94), RandomForest (HR = 7.70), and LightGBM (HR = 6.14), all p < 0.001. Shaded regions indicate 95% confidence intervals. Stacking achieved the strongest discrimination.

**
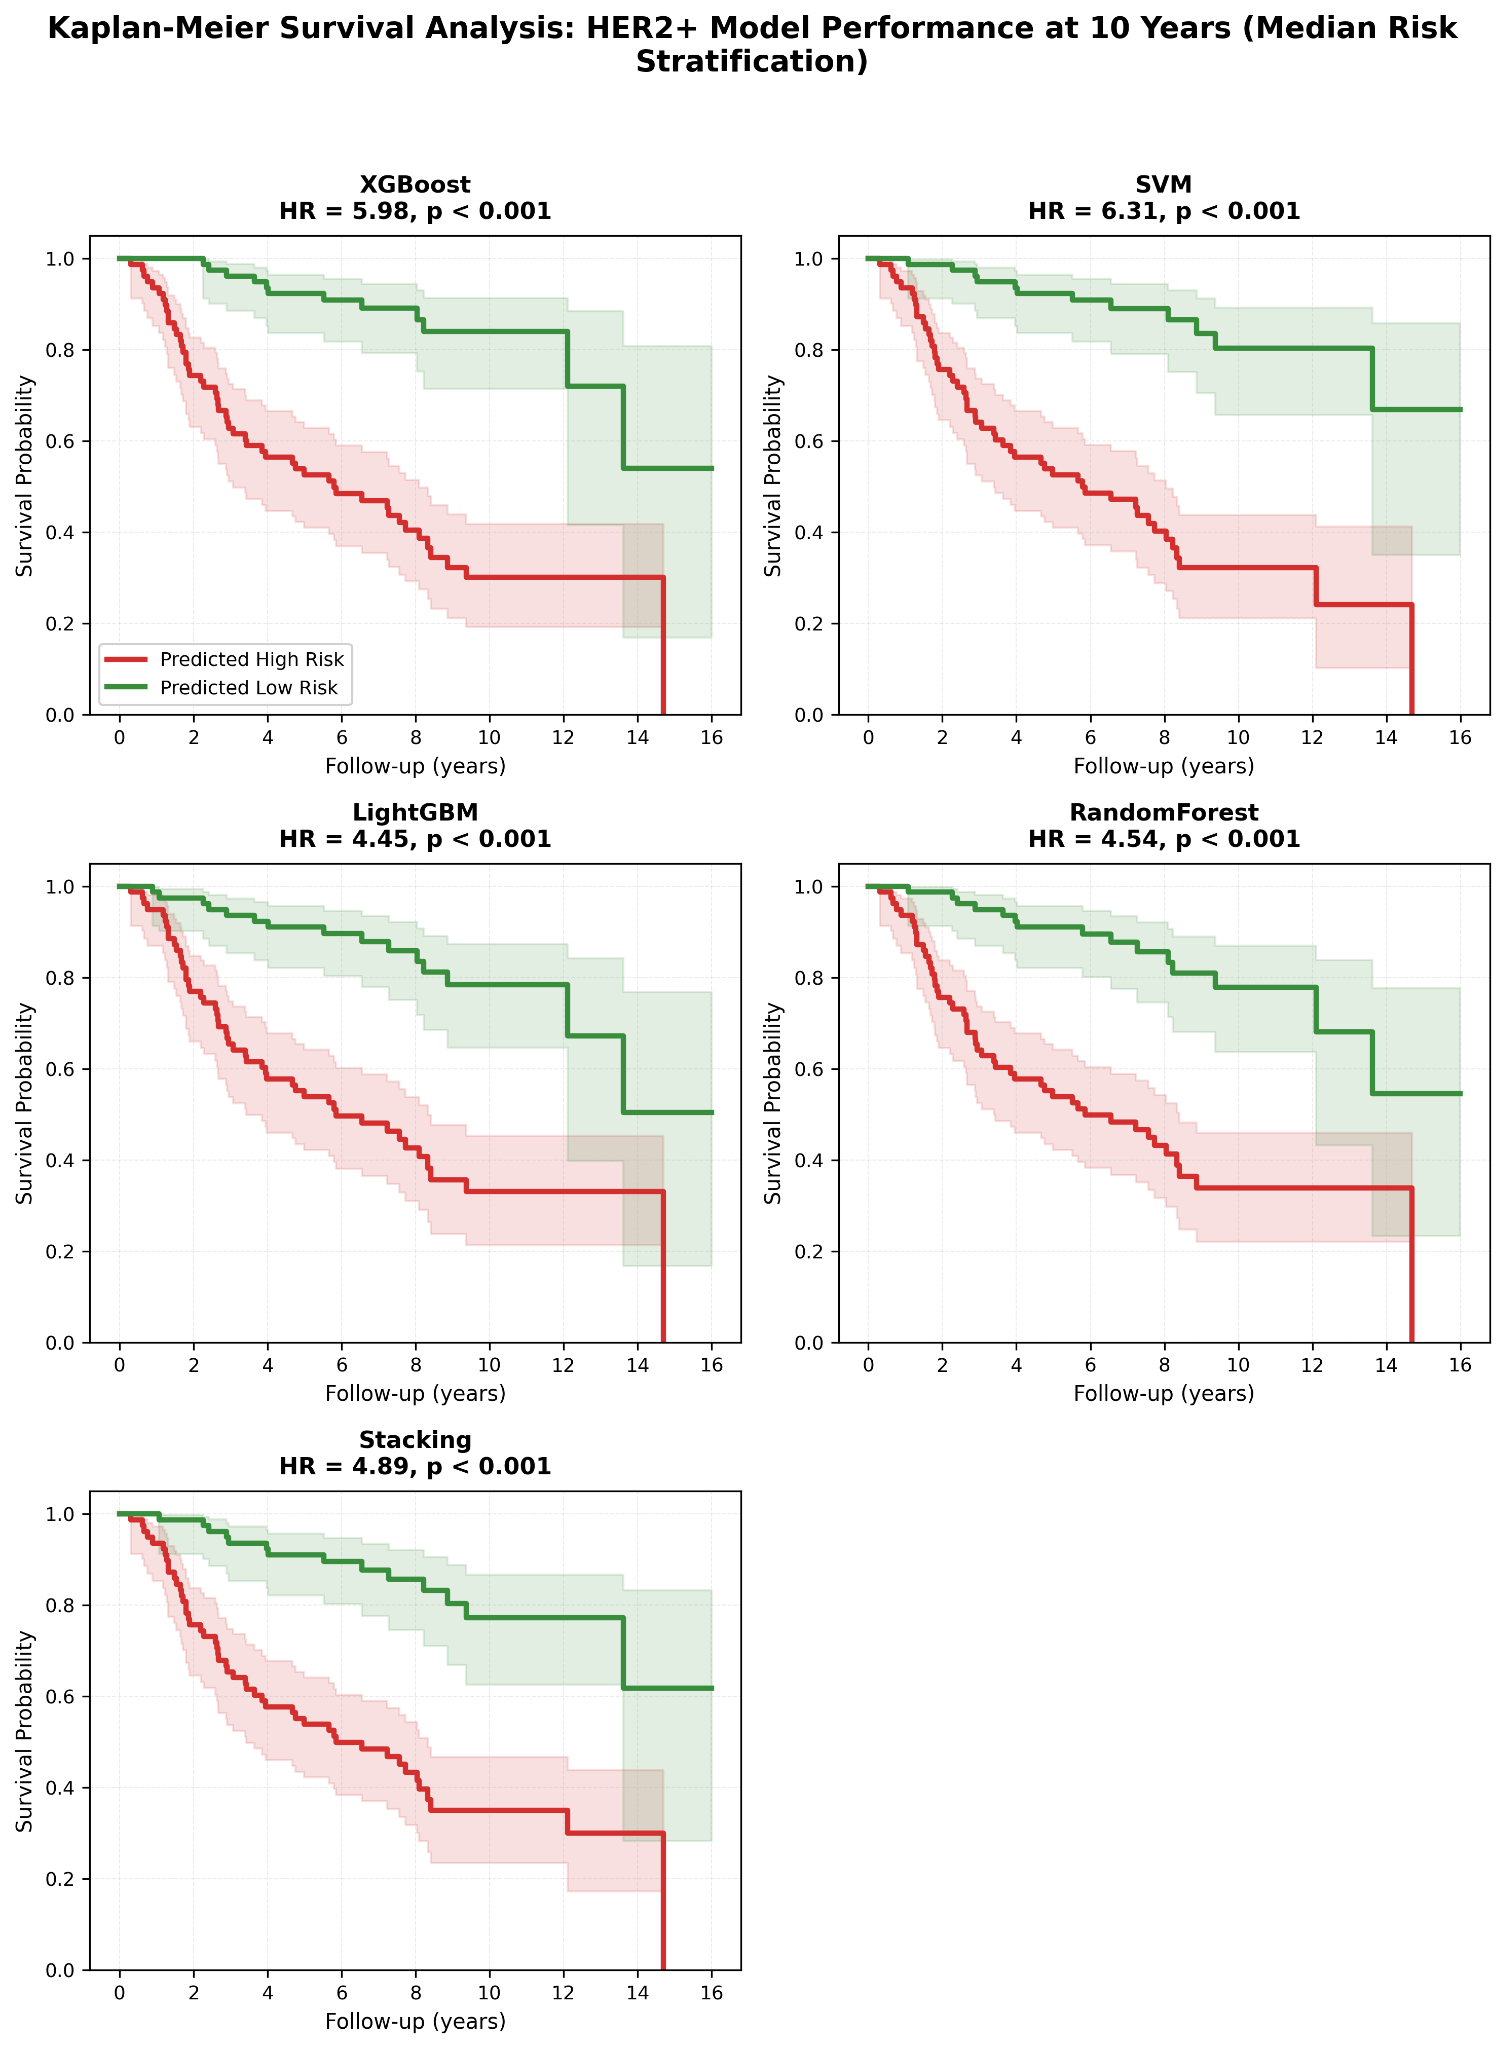
**

**Supplementary Figure S7: Kaplan-Meier Analysis for 10-Year Risk Discrimination in HER2+ Cohort.** Survival curves stratified by median probability threshold comparing high-risk (red) versus low-risk (green) patient groups. All five algorithms demonstrated significant separation with hazard ratios: SVM (HR = 6.31), XGBoost (HR = 5.98), Stacking (HR = 4.89), RandomForest (HR = 4.54), and LightGBM (HR = 4.45), all p < 0.001. Shaded regions indicate 95% confidence intervals. SVM achieved the strongest discrimination.

**
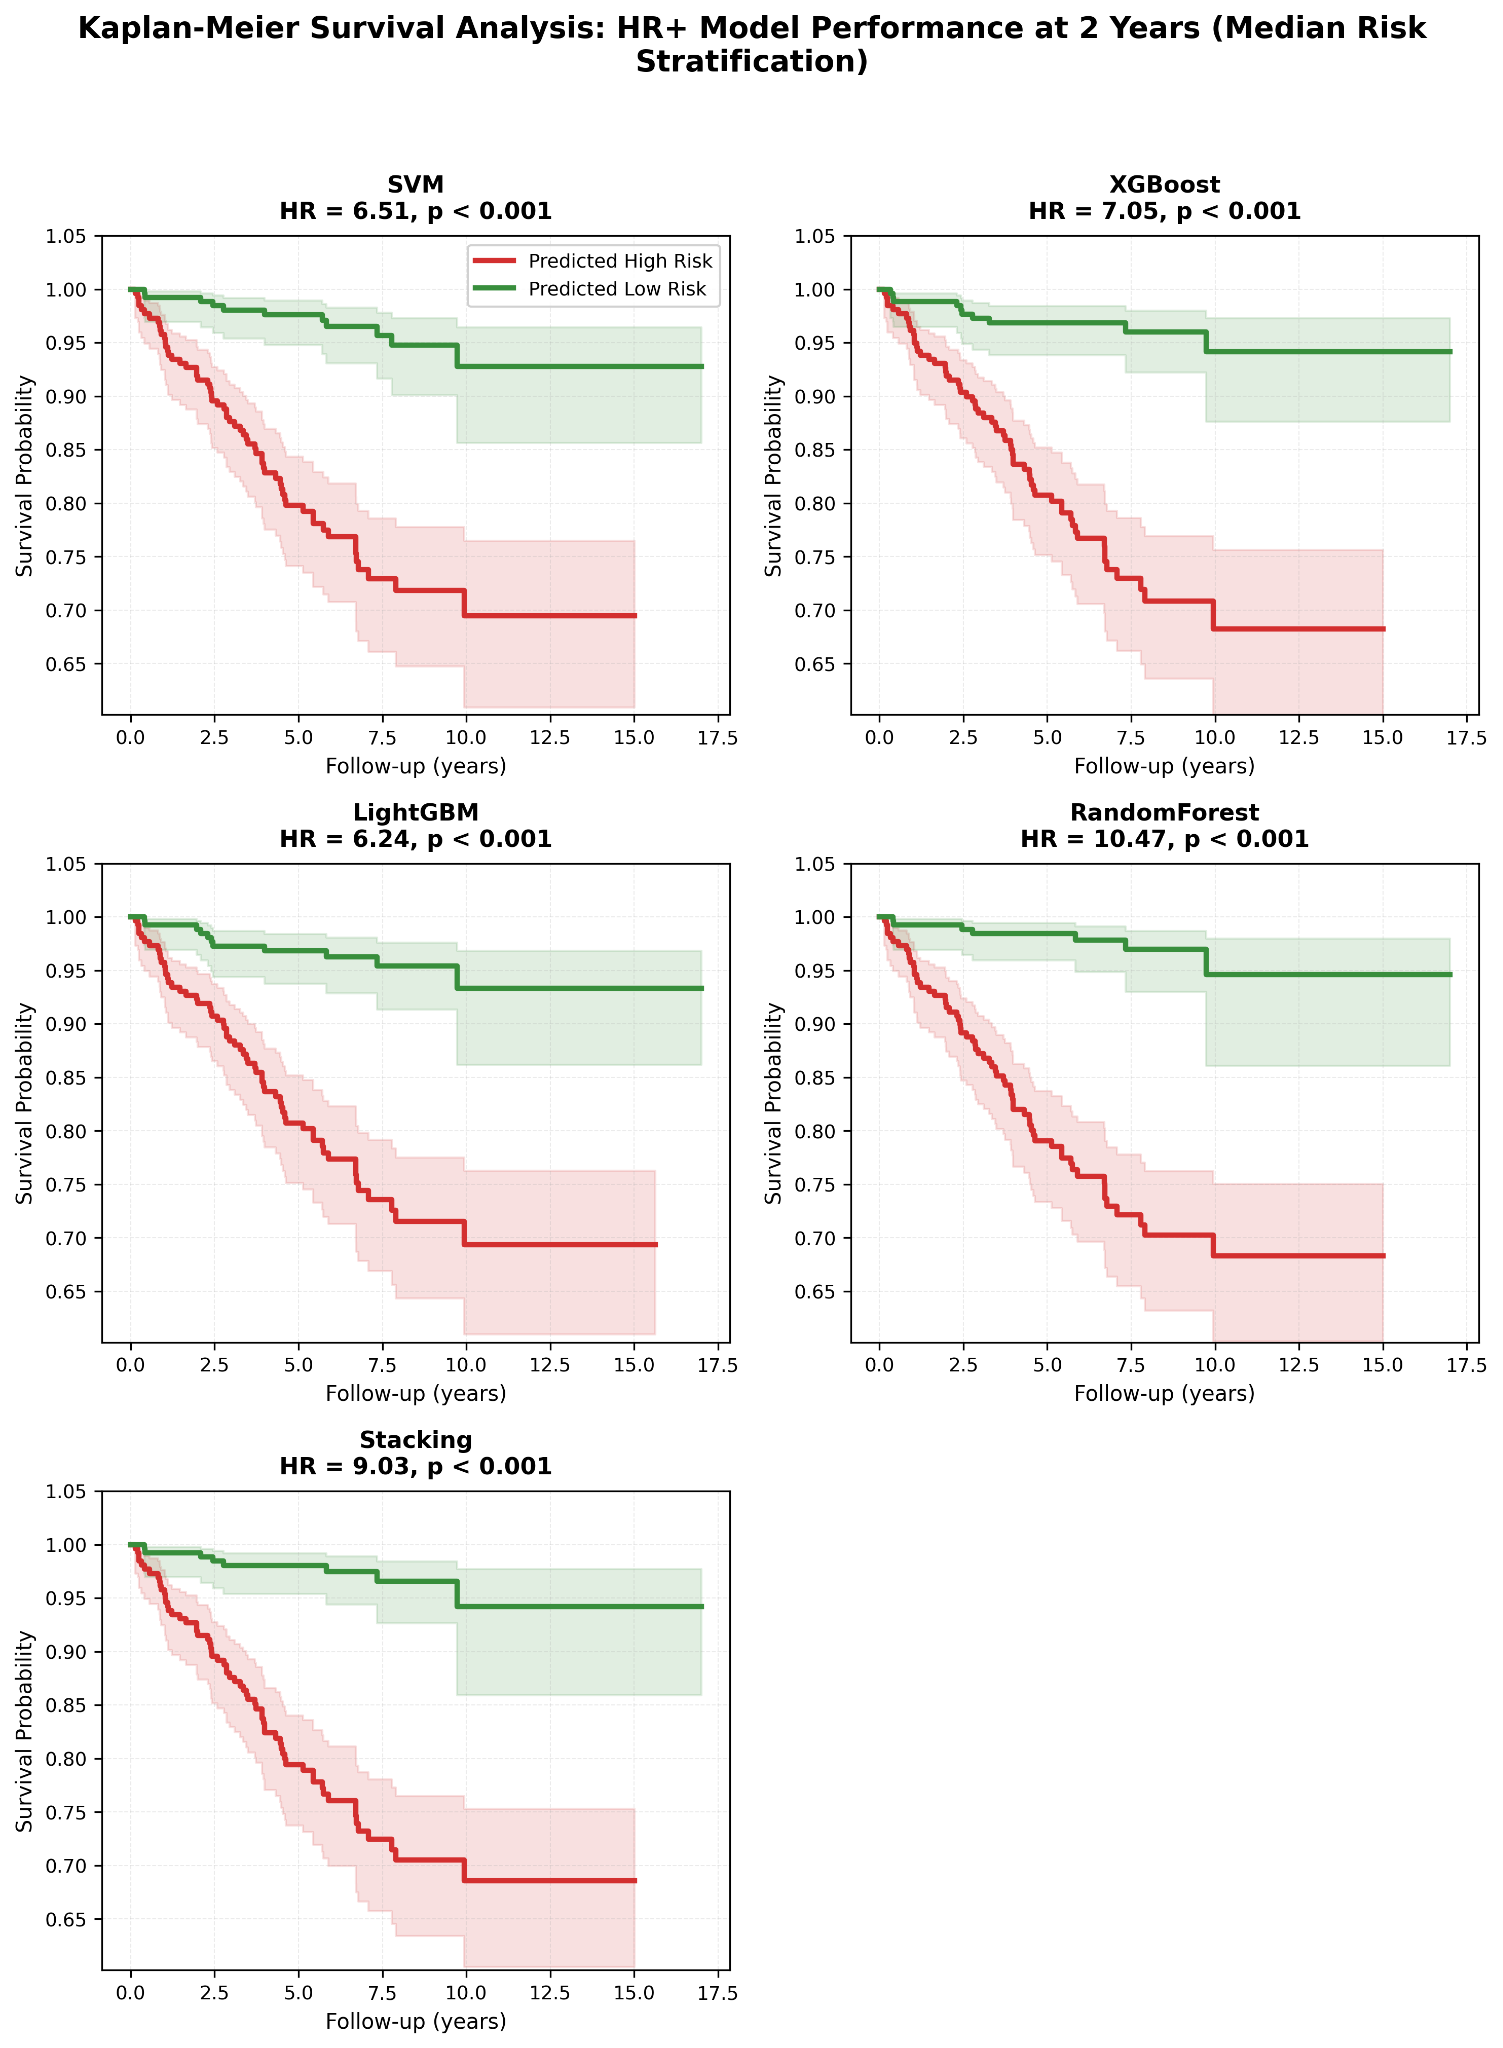
**

**Supplementary Figure S8: Kaplan-Meier Analysis for 2-Year Risk Discrimination in HR+ Cohort.** Survival curves stratified by median probability threshold comparing high-risk (red) versus low-risk (green) patient groups. All five algorithms demonstrated significant separation with hazard ratios: RandomForest (HR = 10.47), Stacking (HR = 9.03), XGBoost (HR = 7.05), LightGBM (HR = 6.24), and SVM (HR = 6.51), all p < 0.001. Shaded regions indicate 95% confidence intervals. RandomForest achieved the strongest discrimination.​


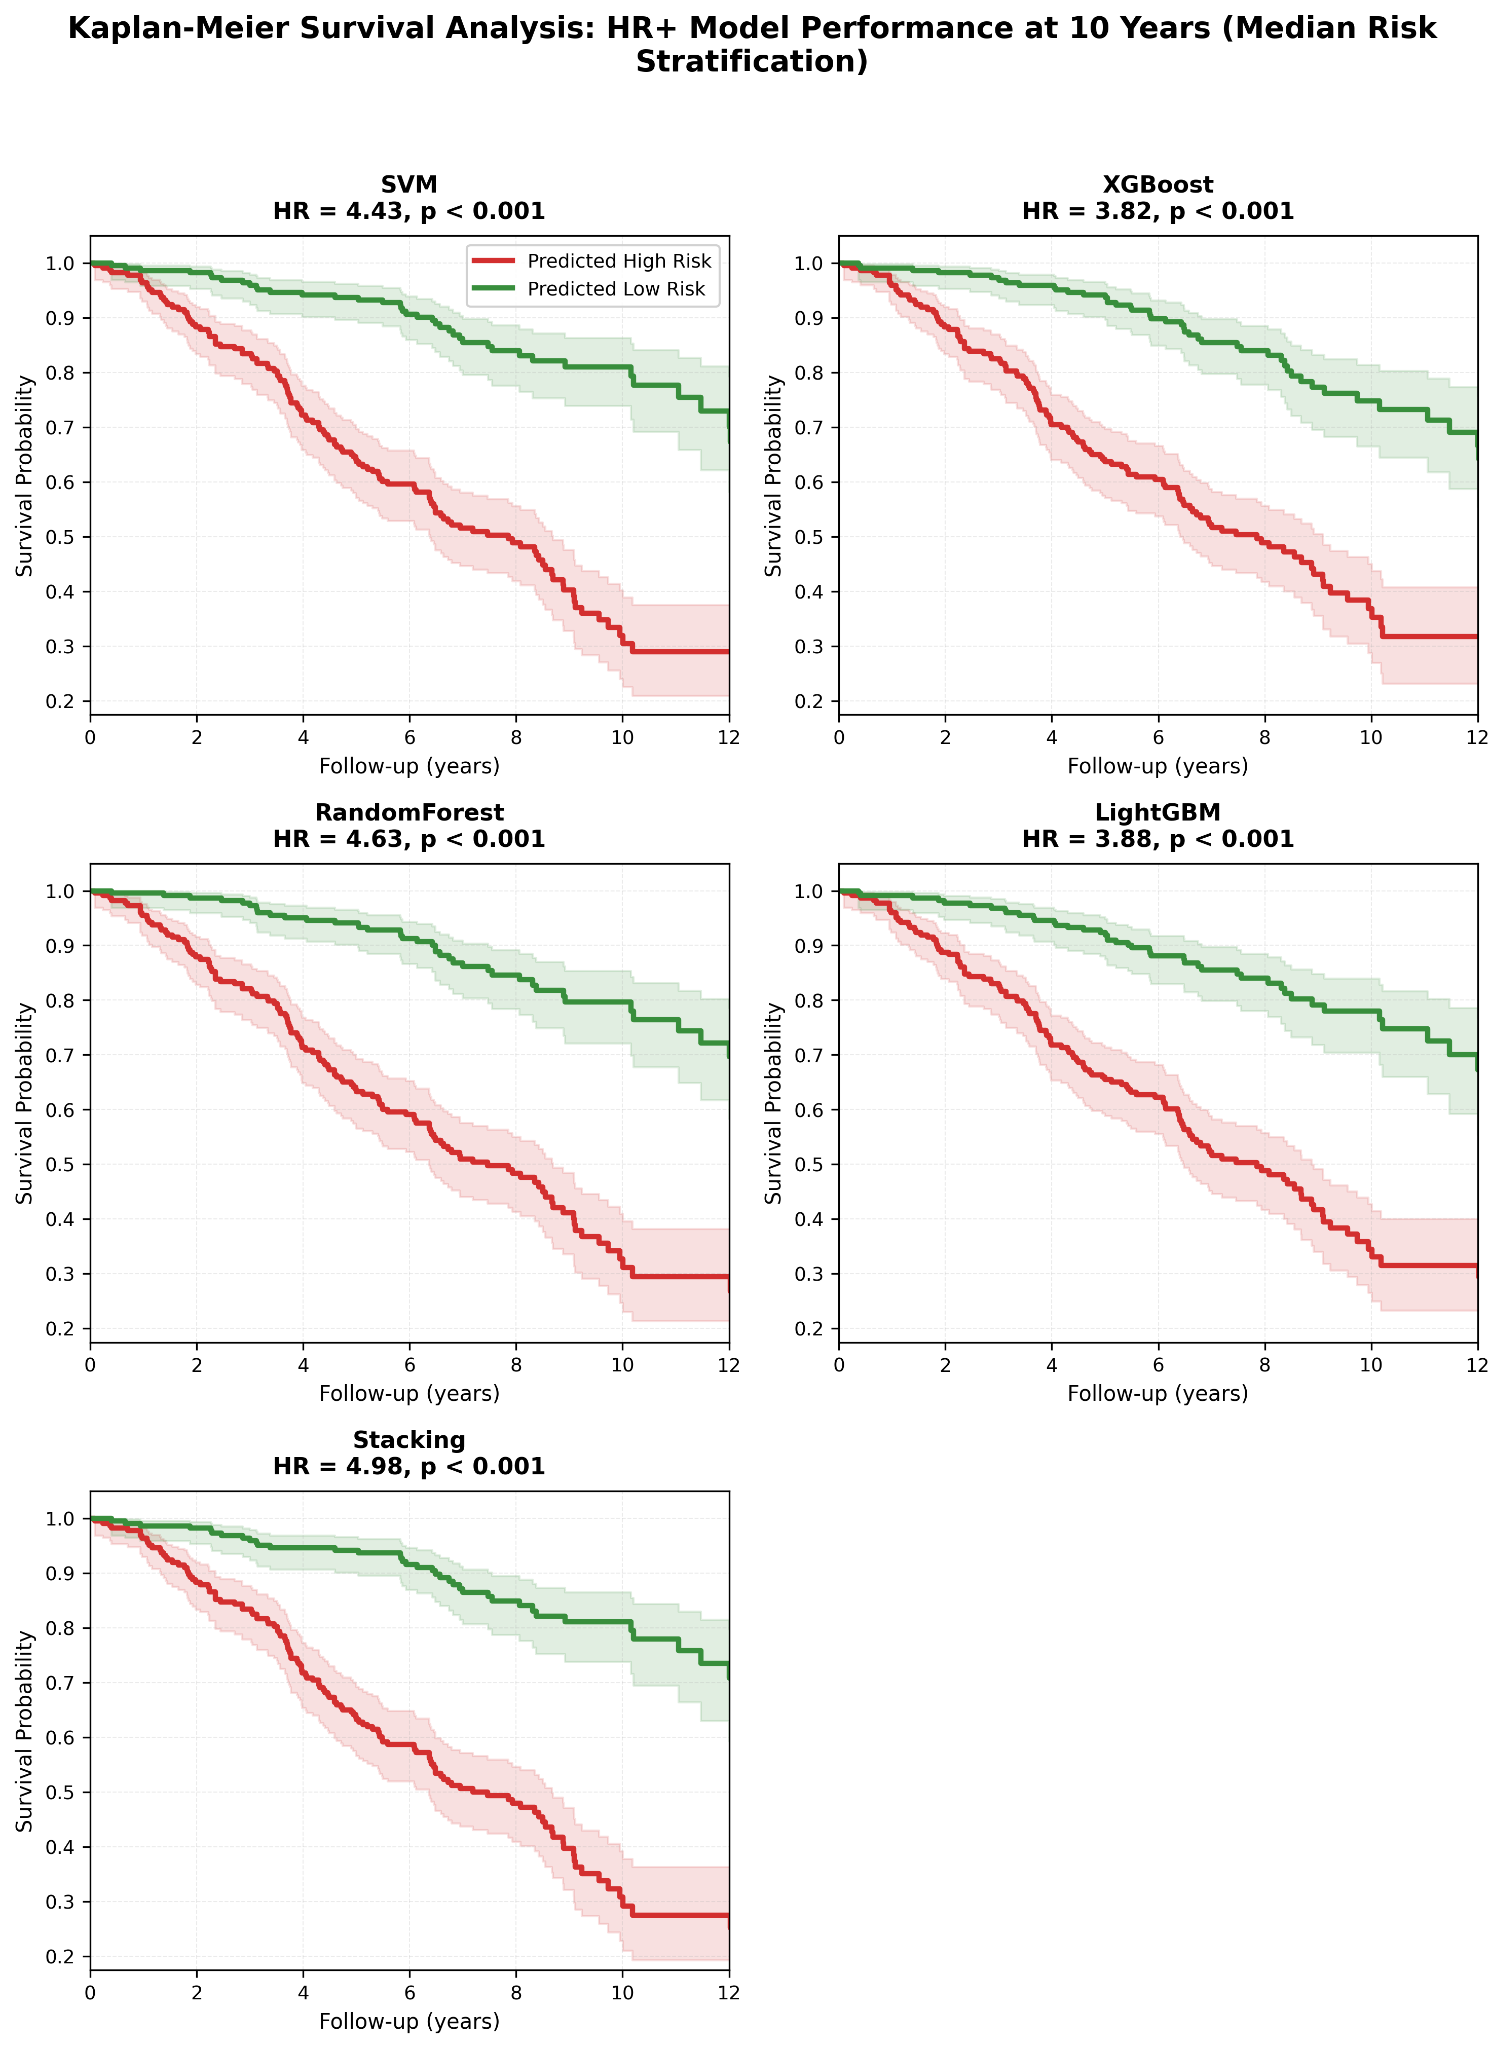


**Supplementary Figure S9: Kaplan-Meier Analysis for 10-Year Risk Discrimination in HR+ Cohort.** Survival curves stratified by median probability threshold comparing high-risk (red) versus low-risk (green) patient groups. All five algorithms demonstrated significant separation with hazard ratios: SVM (HR = 4.43), Stacking (HR = 4.98), RandomForest (HR = 4.63), XGBoost (HR = 3.82), and LightGBM (HR = 3.88), all p < 0.001. Shaded regions indicate 95% confidence intervals. Stacking achieved the strongest discrimination.

**
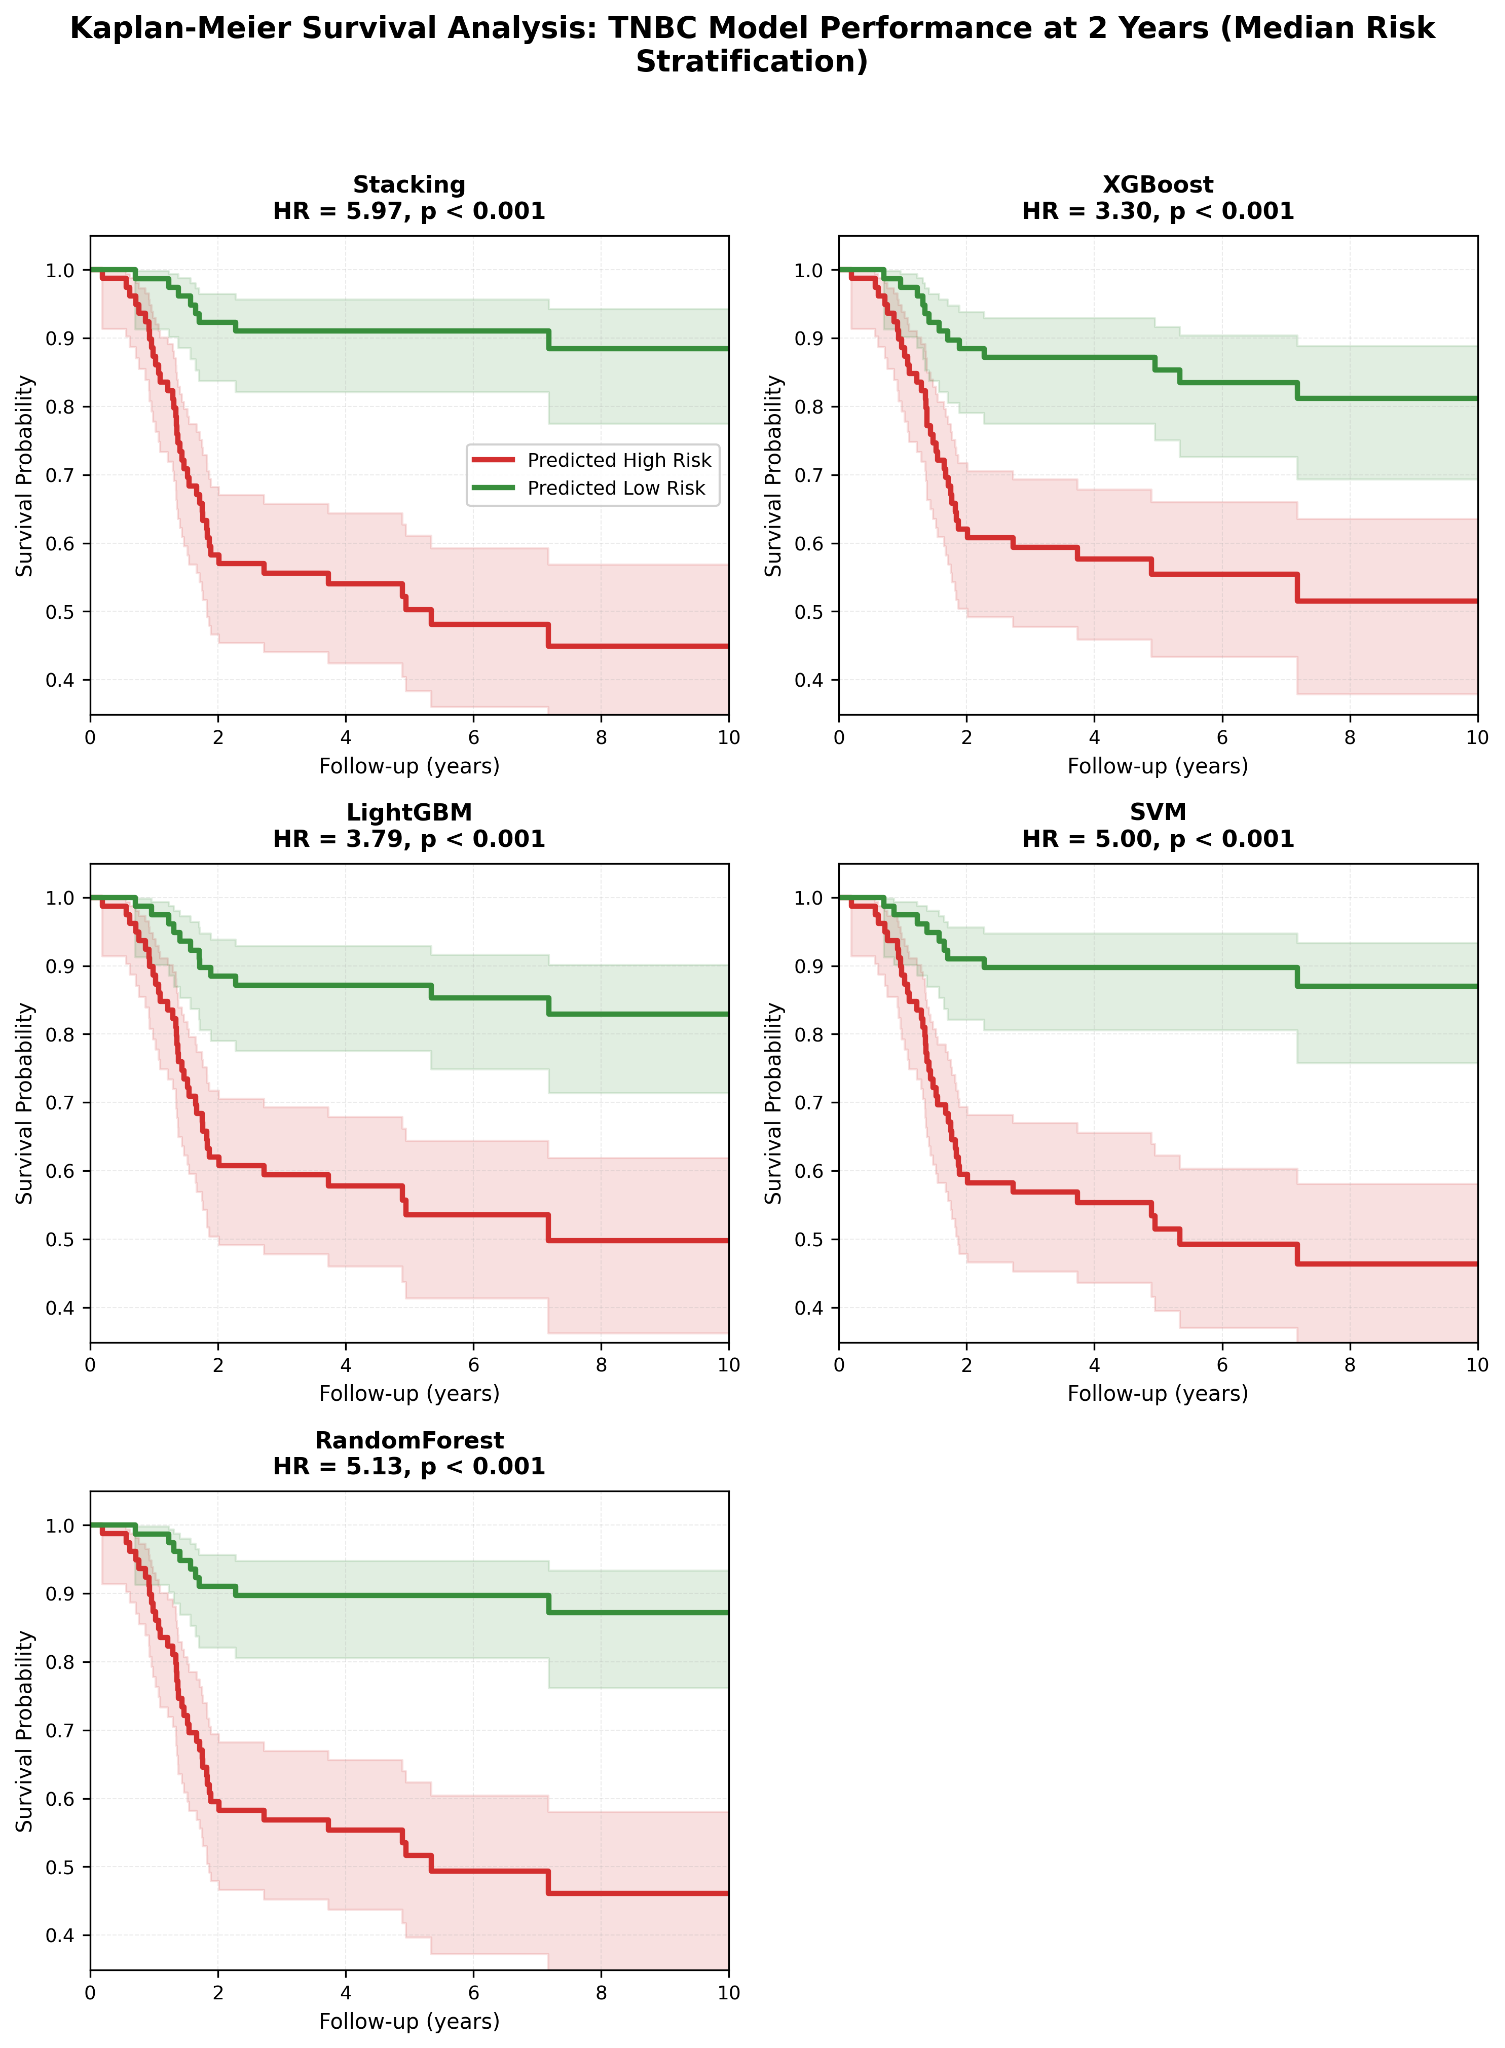
**

**Supplementary Figure S10: Kaplan-Meier Analysis for 2-Year Risk Discrimination in TNBC Cohort.** Survival curves stratified by median probability threshold comparing high-risk (red) versus low-risk (green) patient groups. All five algorithms demonstrated significant separation with hazard ratios: Stacking (HR = 5.97), SVM (HR = 5.00), RandomForest (HR = 5.13), LightGBM (HR = 3.79), and XGBoost (HR = 3.30), all p < 0.001. Shaded regions indicate 95% confidence intervals. Stacking achieved the strongest discrimination.​

**
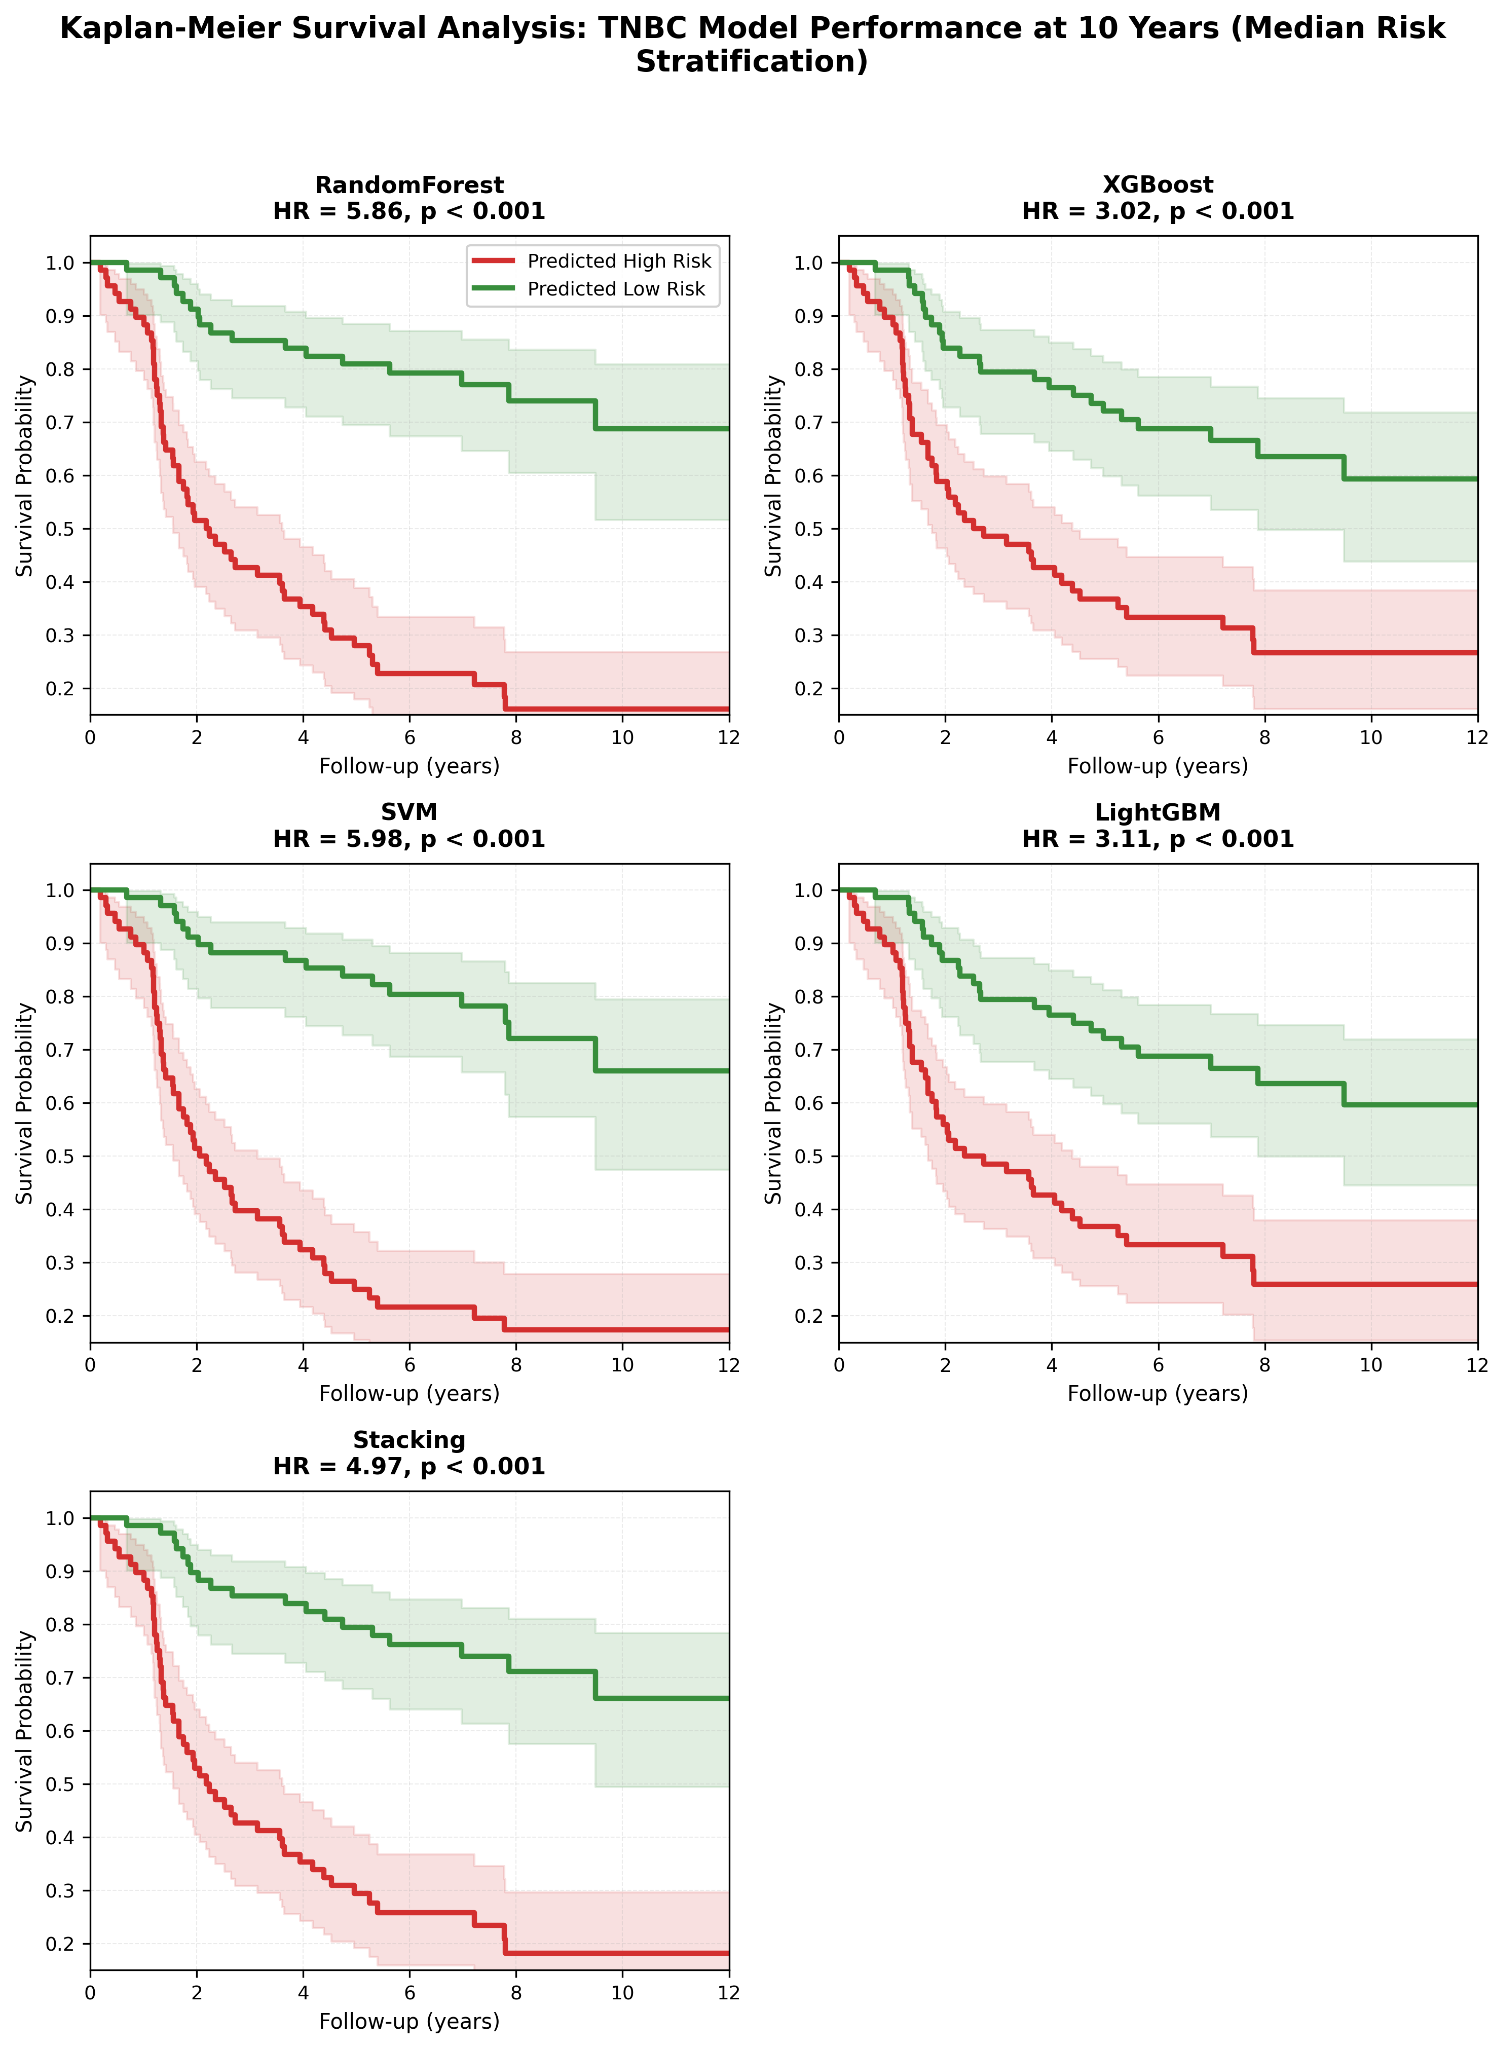
**

**Supplementary Figure S11: Kaplan-Meier Analysis for 10-Year Risk Discrimination in TNBC Cohort.** Survival curves stratified by median probability threshold comparing high-risk (red) versus low-risk (green) patient groups. All five algorithms demonstrated significant separation with hazard ratios: RandomForest (HR = 5.86), SVM (HR = 5.98), Stacking (HR = 4.97), LightGBM (HR = 3.11), and XGBoost (HR = 3.02), all p < 0.001. Shaded regions indicate 95% confidence intervals. SVM achieved the strongest discrimination.
